# Cold tolerance is linked to osmoregulatory function of the hindgut in *Locusta migratoria*

Lucie Gerber\* and Johannes Overgaard

Zoophysiology, Department of Bioscience, Aarhus University, DK-8000 Aarhus, Denmark

\*Author for correspondence (lucigerber@bios.au.dk)

Summary statement: We highlight the role of the hindgut in insect cold tolerance: cold impairs rectal reabsorption whereas cold-acclimation enhanced water but not potassium reabsorption contributing to the preservation of extracellular homeostasis.

Key words: hypoxia, insect, ion flux, paracellular permeability, rectal sac, water reabsorption.

## Abstract

There is growing evidence that maintenance of ion and water balance determine cold tolerance in many insects. The hindgut of terrestrial insects is critical for maintaining organismal homeostasis as it regulates solute- and water-balance of the hemolymph. Here we used *ex vivo* everted gut sacs of *L. migratoria* to examine the effects of temperature (0 - 30°C), thermal-acclimation, hypoxia, and ionic and osmotic forces on bulk water and ion (Na<sup>+</sup>, K<sup>+</sup> and Cl<sup>-</sup>) movement across the rectal epithelium. These findings were related to simultaneous *in vivo* measurements of water and ion balance in locusts exposed to similar temperatures. As predicted, we observed a critical inhibition of *net* water and ion reabsorption at low temperature that is proportional to the *in vivo* loss of water and ion homeostasis. Further, cold-acclimated locust, known to defend ion and water balance at low temperature, were characterised by improved reabsorptive capacity at low temperature. These findings strongly support the hypothesis that transport mechanisms in the hindgut at low temperature are essential for cold tolerance. The loss of osmoregulatory capacity at low temperature was primarily caused by reduced active transport while rectal paracellular permeability to fluorescein isothiocyanate dextran was unchanged at 0 and 30°C. During cold exposure, water reabsorption was independent of major cation gradients across the epithelia while reduction in mucosal Cl<sup>-</sup> availability and increase in mucosal osmolality markedly depressed water reabsorption. These findings are discussed in perspective of existing knowledge and with suggestions for future physiological studies on cold acclimation and adaptation in insects.

## Introduction

Insects are the largest animal group in terms of both species richness and biomass and play important roles in nearly all ecosystems (Chown and Nicolson, 2004; Harrison et al., 2012). The enormous success of insects is closely linked to the physiological adaptations that have allowed specific species to tolerate specific sets of environmental conditions (Beyenbach, 2016; Chown and Terblanche, 2006; Edney, 1977). Such physiological adaptations are for example seen in the emerging studies that connect cold tolerance to osmoregulatory capacity (Andersen et al., 2017a; Des Marteaux et al., 2018; Des Marteaux et al., 2017; MacMillan et al., 2015a; MacMillan et al., 2017; Terhzaz et al., 2015). The capacity to preserve ion and water homeostasis at low temperature is therefore crucial for the thermal tolerance of insects.

Most insect species are chill-susceptible meaning they succumb to low temperature because of loss of physiological capacity at temperatures above that causing ice formation in their body fluids (Bale, 1996; Nedved, 2000; Overgaard and MacMillan, 2017; Sinclair et al., 2015). One problem for chill-susceptible insects is the loss of water and  $\text{Na}^+$  from the hemolymph which is moved to the gut or other tissues (Des Marteaux and Sinclair, 2016; Košťál et al., 2004; MacMillan and Sinclair, 2011a; MacMillan et al., 2015b; Olsson et al., 2016). This reduction in hemolymph volume causes concentration of extracellular  $\text{K}^+$  ( $[\text{K}^+]_{\text{ext}}$ ) that induces cell depolarisation and mortality (Andersen et al., 2017b; Košťál et al., 2004; Košťál et al., 2007; MacMillan et al., 2014; MacMillan et al., 2015c). Accordingly, several studies have demonstrated a correlation between improved osmoregulatory function and cold tolerance in insects that are cold acclimated or cold adapted (Andersen et al., 2017a; Andersen et al., 2017b; Coello Alvarado et al., 2015; Findsen et al., 2013; MacMillan et al., 2015a). Furthermore, recent studies have shown specifically how cold acclimation/adaptation preserved ion balance through increased osmoregulatory capacity and/or reduced ion and water leak from the gut (Andersen et al., 2017a; Des Marteaux et al., 2018; MacMillan et al., 2015d; Yerushalmi et al., 2017).

In most terrestrial insects, the regulation of water and ion homeostasis is achieved via the Malpighian tubules and the hindgut (Chapman, 2013; Edney, 1977). Orthopterans are emerging comparative models to study thermal tolerance in insects as many facets of their thermal biology have been studied (Andersen et al., 2017b; Coello Alvarado et al., 2015; Des Marteaux and Sinclair, 2016; Findsen et al., 2013; MacMillan and Sinclair, 2011a; Robertson et al., 2017). Moreover, they are a suitable group because the basic processes for ion and water transport can be measured readily (Hanrahan et al., 1984; Phillips and Audsley, 1995; Phillips et al., 1988; Phillips et al., 1996;

Robertson et al., 2014). In herbivorous insects such as the locust, the Malpighian tubules secrete a KCl-rich primary urine to the hindgut, where selective reabsorption of solutes and water occurs to maintain ion and water balance (Harrison et al., 2012). The rectal region of the hindgut is a major reabsorptive part of this circuit (Irvine et al., 1988; Phillips et al., 1996; Phillips et al., 1998). Rectal reabsorption is powered by energy demanding pumps (e.g. basal Na<sup>+</sup>/K<sup>+</sup>-ATPase, apical V-Type H<sup>+</sup>-ATPase and possibly an electrogenic Cl<sup>-</sup> pump) that set up an electrochemical gradient to transport ions against local chemical gradients (Audsley et al., 2013; Phillips, 1981; Phillips et al., 1988; Phillips et al., 1996). These active transport processes set a local osmotic gradient that drives water reabsorption and therefore link water transport to active ion transport (Goh and Phillips, 1978). Active transport processes are temperature sensitive but the impact of temperature on bulk water and ion movement in insect excretory systems and membrane barrier function (e.g. change in membrane permeability) is poorly studied (but see references above). Furthermore, it is largely unknown how osmotic and ionic forces influence movement of water and ion transport at low temperature.

The working hypothesis for the present study is that low temperature impairs ATP-powered transport of ions to a degree where homeostatic regulation is impaired (MacMillan and Sinclair, 2011b; Overgaard and MacMillan, 2017). This is seen both from an insufficient capacity to actively counter balance the passive leak of ions down their chemical gradients, but also as an incapacity to facilitate active water reabsorption to maintain hemolymph volume. Based on this working hypothesis we set out to explore if the well-known ionic disturbance observed *in vivo* during cold exposure is closely tied to thermal inhibition of reabsorptive capacity of the hindgut. We examined this by measuring net rectal ion ( $J_{net}^{ion}$ ) and fluid ( $J_v$ ) fluxes over a range of experimental temperatures (0 - 30°C) using everted gut sac preparation. These measurements were then related to *in vivo* measurements of hemolymph volume and ion concentrations at the same range of experimental temperatures (0 - 30°C). To investigate this relation in further detail, we examined if cold-acclimated locusts, known to defend ion homeostasis better at low temperature and have improved cold tolerance (Andersen et al., 2017b), were characterised by sustained rectal ion and water reabsorption ( $J_v$  and  $J_{net}^{ion}$ ) rates at low temperatures compared to warm-acclimated locusts. Additionally, since *net* transport is determined by both active transport and passive leak we characterised the active component of rectal transport and rectal epithelial permeability at high and low temperature using severe hypoxia as an inhibitory tool for oxidative ATP-production and fluorescein isothiocyanate dextran (FD4) clearance as a marker of paracellular permeability,

respectively. Finally, we investigated in more details how ionic and osmotic gradients challenge the reabsorptive capacity of the hindgut to better understand the putative role of osmotic and ionic forces for cold tolerance.

## **Material and Methods**

### **Experimental animals and experimental protocol**

Insect were reared as described by Andersen et al., 2017b. Briefly, fourth – fifth instar nymphs of *Locusta migratoria* (Linnaeus, 1758) were obtained from a commercial supplier (Peter Andersen Aps, Fredericia, Denmark) and maintained at 25°C under 12L:12D light cycle. During light hours locusts had access to a heating lamp allowing for behavioural thermoregulation up to > 45°C. Locusts were fed commercial wheat bran and fresh wheat sprouts and had access to water, *ad libitum*. All experiments were carried out on adult *L. migratoria* of both sexes, 1 – 3 weeks past their final moult. Prior to experiments, locusts were placed at constant  $30 \pm 1^\circ\text{C}$  for three days without food but with water available (unless otherwise stated), and referred to as warm-acclimated.

Two sets of experiments were performed: the first set of experiments measured the effects of chronic exposure to a range of temperature on *in vivo* ion and water balance. The second set of experiments used *ex vivo* everted rectal sac preparations to assess how bulk movement of water and major ions across rectal epithelia was affected by temperature, severe hypoxia and change in mucosal osmolality and ion concentration.

### **Effects of temperature on *in vivo* ion and water balance**

The ionic and osmotic consequences of low temperature exposure were determined by measuring hemolymph  $\text{Na}^+$ ,  $\text{K}^+$  and  $\text{Cl}^-$  concentration and extractable hemolymph volume in warm-acclimated locusts after two days at either  $30 \pm 1^\circ\text{C}$ ,  $20 \pm 1^\circ\text{C}$ ,  $10 \pm 1^\circ\text{C}$ ,  $5 \pm 0.5^\circ\text{C}$  or  $0^\circ\text{C}$  (N=7 per group).

For measurements of hemolymph ion concentration, hemolymph was collected in capillary tube from the cervical membrane or from the hind legs. 5  $\mu\text{l}$  of hemolymph sample was transferred to Eppendorf tubes containing 2 ml 100 ppm Lithium buffer (Sherwood Scientific Ltd, Cambridge, UK) for measurements of  $[\text{Na}^+]$  and  $[\text{K}^+]$  by flame photometry (Flame photometer, Model 420, Sherwood Scientific Ltd, Cambridge, UK). 1  $\mu\text{l}$  of hemolymph was used for measurements of  $[\text{Cl}^-]$  by colorimetric assay following the manufacturer's protocol (Chloride Assay Kit, MAK023, Sigma-Aldrich, Steinem, Germany). All measurements of ion concentrations were referenced to standards with known concentration.

Hemolymph volume was approximated in a separate set of animals. Here, locusts were weighed to the nearest 0.001 mg on a balance (Sartorius R200D, Germany) after which hemolymph was sampled from the cervical membrane as described above. The animal was then cut open and residual hemolymph was removed by quickly blotting the tissue with filter paper. Locusts were then reweighed and hemolymph volume was calculated from the mass difference (assuming a specific gravity of 1) and expressed as % of initial wet mass. This simplistic method gave comparable volumes when compare to an inulin method previously used in our lab to estimate hemolymph volume in *L. migratoria* (O'Sullivan et al., 2016).

### ***Ex vivo* experimental series: determination of rectal reabsorption capacity using everted rectal sacs**

The hindgut is a major osmoregulatory organ in insects and here we undertook a series of experiments to examine if organismal water and ion balance is related to water ( $J_v$ ) and ion flux ( $J_{net}^{ion}$ ) across rectal epithelia. Specifically, we used *ex vivo* everted rectal sacs to examine the effects of temperature, thermal-acclimation, severe hypoxia and change in mucosal osmolality and ion concentration on  $J_v$  and  $J_{net}^{ion}$ .

#### *Preparation of everted rectal sacs*

The everted rectal sac preparations and incubation were made using a modified protocol from Hanrahan et al., 1984. A lateral incision was made in the abdomen and the hindgut was kept moist with a standard serosal saline (see composition of salines in Table 1) while trachea and connective tissue were removed under a dissection microscope. A heat-flared polyethylene tube (PE90, 0.86 mm ID; 1.27 mm OD) was inserted and tied into the anterior margin of the rectal pads with a double silk ligature. The rectum was gently everted by withdrawal of the PE90 tube until the posterior margin of the rectal pad emerged and the preparation was then placed in a standard mucosal saline (Table 1). Standard serosal saline was injected through the PE90 tube to rinse the rectum thoroughly before the posterior margin of the rectal pads was tied closed with a second double silk ligature. Any fluid remaining in the sac was then removed through the PE90 tube using a 25  $\mu$ l blunt Hamilton syringe (Hamilton®, Gastight®, #1702). To approximate ionic conditions *in vivo*, sacs were filled with a known volume of standard serosal saline (hemocoel side) and suspended in a bath containing 50 ml standard mucosal saline (rectal lumen side). This condition is

referred to as the ‘standard condition’. The baths were surrounded by a water jacket system to control the experimental temperature and the mucosal saline was continuously bubbled with O<sub>2</sub>.

Pilot experiments demonstrated that everted rectal sac preparations remained stable for up to six hours (data not shown). Additionally, after termination of pilot experiments, everted rectal sacs were placed in a mucosal saline containing 10 mmol l<sup>-1</sup> amaranth to test for possible leakage (the epithelium is impermeable to amaranth and any leak would indicate structural damage in the preparation; Phillips and Dockrill, 1968). No dye was observed on the hemocoel side attesting of the stability and quality of the preparation.

#### *Measurements of net water flux*

Net fluid flux ( $J_v$ ) was measured gravimetrically. Before each experimental period, everted rectal sacs were blotted on medical wipes and filled with a known volume (typically around 2  $\mu$ l) of standard serosal saline. The precise volume injected in the sacs was determined by weighing the sacs to the nearest 0.0001 mg before (i.e., empty sac mass;  $m_e$ ) and after the filling (i.e., initial sac mass;  $m_i$ ) using a micro balance (Sartorius MSA6.6S-0CE-DM, Germany). After a set time ( $t$ ) under the desired experimental conditions (typically 1 hour) sacs were blotted and re-weighed to determine the final sac mass ( $m_f$ ). The hemocoel fluid (final absorbate) was subsequently sampled for later analysis using a blunt Hamilton syringe. The sacs were then rinsed with standard serosal saline and prepared for a new incubation hour as described above. Therefore, every sac preparation was used as its own control and incubated up to five hours. Since changes in total sac mass could be due to both change in tissue and hemocoel volumes, comparison of empty sac masses measured at the start and end of each incubation period ( $m_{e1}$  and  $m_{e2}$ , respectively) could be used to report any changes in tissue volume (i.e. typically < 1%, due to tissue swelling and change of hydration state of the tissue). Hence, net change in hemocoel volume was determined by subtracting the change in tissue volume to the measured final sac mass. At the end of the experimental series, rectal sacs were cut open by a longitudinal incision and the gross surface area (SA) of the exposed epithelial surface was determined by placing a clear acetate sheet onto the epithelium and tracing its outline. The acetate sheet was then cut along the outline and the epithelial surface was estimated from the mass of the sheet compared to the mass of a sheet of known area. Then, measured individual rectal surface areas were converted to a standard rectum size of 0.631 cm<sup>2</sup> instead of conversion into the standard unit of 1.00 cm<sup>2</sup> for analysis. This allow direct comparison with previous studies where rectal surface area of the sac was not determined and *net* fluxes reported as rectum<sup>-1</sup> (Goh and

Phillips, 1978). The standard rectum size of 0.631 cm<sup>2</sup> selected was determined from the gross surface area of fifty recta and is comparable to the surface area for locust rectum found in the literatures (Hanrahan and Phillips, 1984; Irvine et al., 1988).

Net fluid transport  $J_v$  was calculated as previously described by Whittamore et al., 2016 with some modification (i.e., correction for tissue volume changes and use of an everted preparation):

$$J_v = \frac{(m_f - m_i) - (m_{e1} - m_{e2})}{\frac{SA}{t}}$$

where,  $m_f$  is the final sac mass (mg),  $m_i$  the initial sac mass (mg),  $m_{e1}$  the initial empty sac mass (mg),  $m_{e2}$  the final empty sac mass (mg),  $SA$  the surface area of the sac (cm<sup>2</sup>) and  $t$  the time of incubation (h). Net  $J_{net}^{ion}$  was then expressed as  $\mu\text{mol rectum}^{-1} \text{h}^{-1}$ , where rectum = 0.631 cm<sup>2</sup>. Positive values for  $J_v$  indicates net fluid absorption from the rectal lumen towards the hemolymph while negative values indicate net fluid secretion.

#### Measurements of ion flux

Net ion flux ( $J_{net}^{ion}$ ) was calculated for each incubation period from the change in volume and specific ion (Na<sup>+</sup>, Cl<sup>-</sup>, K<sup>+</sup>) concentrations of the hemocoel fluid as follows:

$$J_{net}^{ion} = \frac{(V_f * C_f) - (V_i * C_i)}{\frac{SA}{t}}$$

Where,  $V_f$  is the final hemocoel volume ( $\mu\text{l}$ ),  $C_f$  the final hemocoel concentration of the targeted ion ( $\text{mmol l}^{-1}$ ),  $V_i$  the initial hemocoel volume ( $\mu\text{l}$ ),  $C_i$  the initial hemocoel concentration of the targeted ion ( $\text{mmol l}^{-1}$ ),  $SA$  the surface area of the sac (cm<sup>2</sup>) and  $t$  the time of incubation (h). Net  $J_{net}^{ion}$  was then expressed as  $\mu\text{mol rectum}^{-1} \text{h}^{-1}$ , where rectum = 0.631 cm<sup>2</sup>. Ion concentrations of the hemocoel fluid were determined as described above for *in vivo* experiments using flame photometry (Na<sup>+</sup> and K<sup>+</sup>) and a colorimetric assay (Cl<sup>-</sup>).



## Effects of temperature, thermal-acclimation, severe hypoxia, osmolality and mucosal ion concentration on net rectal ion and water fluxes

The basic preparation of the everted rectal sac described above was used for a range of experiments in which the experimental conditions (temperature, oxygen level and saline composition) was manipulated.  $J_v$  and  $J_{net}^{ion}$  measured under each experimental condition were compared to  $J_v$  and  $J_{net}^{ion}$  measured under 'standard condition' (i.e. 'standard salines' at 30°C with constant O<sub>2</sub> bubbling, see Table 1). Hence, typical experiments were initiated and/or terminated by baseline measurements in 'standard condition'. The precise experimental conditions of each series are specified below.

### *Series 1: Thermal dependence of net water and ion fluxes*

The temperature-dependence of  $J_v$  and  $J_{net}^{ion}$  across the rectal wall of *L. migratoria* was evaluated by incubation of everted rectal sacs under 'standard condition' for 2 x 1 hour at 30°C and then for 2 x 1 hour at one of the tested temperature: 20°C, 10°C, 5°C or 0°C (N=6 per group).

### *Series 2: Effect of acclimation on net water and ion fluxes*

The effect of thermal acclimation on  $J_v$  and  $J_{net}^{ion}$  across the rectum wall was investigated on warm- and cold-acclimated locusts. Locusts were acclimated for five days at either 30 ± 1°C (N=5) or 11 ± 1°C (N= 5; a temperature at which cold tolerance is enhanced at the organismal level, see Andersen et al., 2017b). Following the acclimation period,  $J_v$  and  $J_{net}^{ion}$  were determined by incubation of everted rectal sacs in standard mucosal saline at their acclimation temperatures for 2 x 1 hour followed by one hour at 0°C and terminated with one hour at the acclimation temperature of the comparison group. To test the reversibility of the acclimation response and plasticity/sensitivity of the tissues to temperature changes, the order of the incubation periods was inverted in a separate set of acclimated animals (N=5, per group) but incubation at 0°C was omitted. Thereby, everted rectal sacs from cold-acclimated locusts were incubated 2 x 1 hour at 30°C prior to incubation for 2 x 1 hour at their acclimation temperature and *vice versa*.

### *Series 3: Metabolic dependence of net water and ion fluxes*

The metabolic dependence of net water and ion fluxes at high and low temperatures was examined using O<sub>2</sub> depletion as an inhibitory tool for oxidative-phosphorylation. Severe hypoxia was induced by substituting the regular constant O<sub>2</sub> bubbling with constant N<sub>2</sub> bubbling into the bath and bubbling the serosal saline with N<sub>2</sub> prior injection into everted rectal sacs. To limit gas exchange,

the water surface was covered with expanded polystyrene and wrapped in aluminium foil. Everted rectal sacs were incubated under ‘standard condition’ for 2 x 1 hour (i.e. 30°C and constant O<sub>2</sub>) followed by 2 x 1 hour at either 30°C + N<sub>2</sub> (N=5) or 0°C + N<sub>2</sub> (N=6) before returning to ‘standard condition’ for one hour. Net  $J_v$  and  $J_{net}^{ion}$  measured under anoxic conditions were compared to  $J_v$  and  $J_{net}^{ion}$  observed under ‘standard condition’ and hypothermia.

#### *Series 4: Temperature dependence of rectal paracellular permeability*

The temperature dependence of rectal paracellular permeability was determined by measuring rectal clearance of the permeability probe fluorescein isothiocyanate dextran (FD4, molecular mass = 4,000 Da) as previously described (Bao et al., 2014; Yang et al., 2002; Zhang et al., 2009) with some modifications. Briefly, everted rectal sacs (N=5) were suspended in standard mucosal saline containing 2.0 mg ml<sup>-1</sup> FD4 (mucosal side) for 2 x 1 hour at 30°C followed by 2 x 1 hour at 0°C. Between each incubation hour, hemocoel fluid (i.e., final absorbate) was removed, and sacs rinsed with fresh standard serosal saline before refilling with standard serosal saline (without FD4). The concentration of FD4 was determined in the hemocoel fluid and rinsing fluid using a fluorescence plate reader (Victor<sup>3</sup> 1420-041, Multilabel Plate Counter, PerkinElmer<sup>®</sup>, USA) at an excitation wavelength of 485 nm and an emission wavelength of 535 nm. Rectal permeability was expressed as the mucosal-to-serosal clearance of FD4:

$$FD4 \text{ clearance} = \frac{FD4_{ser} * V_f}{FD4_{muc} * t * SA}$$

where,  $FD4_{ser}$  is the concentration of FD4 in hemocoel fluid (i.e., serosal side) measured at the end of the incubation period (ng μl<sup>-1</sup>),  $FD4_{muc}$  the initial concentration of FD4 in the mucosal saline (ng μl<sup>-1</sup>),  $V_f$  the final volume of hemocoel fluid in the sacs (μl),  $SA$  the surface area of the sac (cm<sup>2</sup>) and  $t$  the time of incubation (h). FD4 clearance was then expressed as nl rectum<sup>-1</sup> h<sup>-1</sup>, where rectum = 0.631 cm<sup>2</sup>.

#### *Series 5: Dependence of net water and ion fluxes on osmotic and ionic gradients, at high and low temperature*

The dependence of  $J_v$  and  $J_{net}^{ion}$  on osmotic and ionic gradients was investigated at 30°C and 0°C.  $J_v$  and  $J_{net}^{ion}$  of all everted rectal sacs was assessed under ‘standard conditions’ and under one of the

tested ionic and osmotic conditions. To determine the dependence of  $J_{net}^{ion}$  on mucosal  $[Na^+]$ ,  $[K^+]$  and  $[Cl^-]$ , the composition of the bathing salines was manipulated to reduce or increase mucosal  $[Na^+]$ ,  $[K^+]$  and  $[Cl^-]$ , thereby manipulating ionic gradients (see Table 1 for saline compositions). Everted rectal sacs were always filled with the standard serosal saline. To test the influence of ionic gradients and mucosal [ion] on  $J_v$  and  $J_{net}^{ion}$ , sacs were then placed either in a serosal saline to cancel the typical cation gradients and increase mucosal  $[Na^+]$  (N=7) or in a modified mucosal saline with reduced mucosal  $[Cl^-]$  to create a  $Cl^-$  gradient (N=5). Sacs were incubated under these experimental conditions for 2 x 1 hour at 30°C followed by 2 x 1 hour at 0°C before returning to ‘standard condition’ for one hour (i.e., in standard mucosal saline with low  $[Na^+]$ , high  $[K^+]$  and  $[Cl^-]$ ).

To test the influence of osmotic gradients, the mucosal side was made hyperosmotic by adding sucrose to the standard mucosal saline thereby creating an osmotic gradient of 300 mOsm  $kg^{-1}$  (N=6) or of 700 mOsm  $kg^{-1}$  (N=5) across the rectal wall (Table 1). Everted rectal sacs were incubated for 2 x 1 hour under ‘standard condition’ before an epithelial osmotic gradient was created and the sacs incubated for 2 x 1 hour at 30°C followed by one hour at 0°C. The osmolality of the saline solutions was determined and adjusted on a vapor pressure osmometer (Advanced® Micro-Osmometer Model 3320, MA, USA). For each experiment, the net  $J_v$  and  $J_{net}^{ion}$  measured were compared to  $J_v$  and  $J_{net}^{ion}$  observed under ‘standard condition’ (i.e., standard mucosal saline with low  $[Na^+]$ , high  $[K^+]$  and  $[Cl^-]$ ). In the experiment involving osmotic gradient, the size of the absorbate collected prevented us to determine  $J_{net}^{ion}$  (hemocoel volume < 2  $\mu$ l).

### Data analysis

All data are presented as mean  $\pm$  s.e.m. and N indicates the number of locusts used. Data collected from the same everted rectal sac under a given experimental condition were pooled for graphical representations. All statistical comparisons were performed using GraphPad Prism v5.02 software (La Jolla, CA, USA) and P-values < 0.05 were considered significant. Data were analysed using either one-way ANOVA followed by Tukey’s post hoc multiple comparison test or repeated-measures two-way ANOVA, as specified in the figure legends. When necessary, data were log-transformed to meet the parametric assumptions of ANOVA.

## Results

### *Effects of temperature on in vivo ion and water balance and ex vivo water and ion fluxes*

Hemolymph volume and ionic composition were progressively altered with decreasing temperatures (Fig. 1A, B), particularly below 5°C. Warm-acclimated locusts kept for two days at 5°C and 0°C had significantly reduced volume of hemolymph compared to warm-acclimated locusts placed at 30°C (Fig. 1A). In addition, at 0°C hemolymph  $[Na^+]$  and  $[Cl^-]$  decreased by ~25% whereas  $[K^+]$  doubled (Fig. 1B).  $[Cl^-]$  was only significantly reduced at 0°C whereas  $[Na^+]$  and  $[K^+]$  were already significantly reduced at 5°C. Measurement of bulk water and specific ion (i.e.  $Na^+$ ;  $K^+$  and  $Cl^-$ ) movement ( $J_v$  and  $J_{net}^{ion}$ ) across everted rectal sacs demonstrated a *net* reabsorption of both water and ions from the gut lumen to the hemocoel side at both high and low temperature. The mean  $\pm$  s.e.m. of  $J_v$  and  $J_{net}^{ion}$  at 30°C, 20°C, 10°C, 5°C and 0°C are presented in Table 2 where positive  $J_v$  and  $J_{net}^{ion}$  values represent *net* reabsorption. *Net* reabsorption of water and ions across the rectum wall was gradually reduced with decreasing temperature (Fig. 1C, D and Table 2).  $J_{net}^{Na^+}$  flux was severely depressed at 10°C, where only 30% of the flux at 30°C was preserved.  $J_v$ ,  $J_{net}^{K^+}$  and  $J_{net}^{Cl^-}$  reached their maximal inhibition at 5°C; where fluxes were reduced to 23%, 24% and 32% of fluxes at 30°C, respectively.

### *Effect of acclimation on net water and ion fluxes*

In warm-acclimated locusts,  $J_v$  and  $J_{net}^{ion}$  measured for any ion were significantly decreased at 10°C and 0°C. Cold-acclimation slightly, though significantly, enhanced  $J_v$  across the rectal wall at 10°C but not at 0°C (Fig. 2A).  $J_{net}^{Na^+}$  and  $J_{net}^{Cl^-}$  across rectal wall of cold-acclimated locusts at 10°C were similar to  $J_{net}^{Na^+}$  and  $J_{net}^{Cl^-}$  measured across cold- and warm-acclimated recta at 30°C (Fig. 2B, C).  $J_{net}^{K^+}$  was not significantly different between warm- and cold-acclimated locust at any temperatures tested (Fig. 2D). At 0°C,  $J_v$  and  $J_{net}^{ion}$  were not significantly different between warm- and cold-acclimated locusts. Yet, the benefit of the cold-acclimation treatment was lost by acute exposure to 30°C (see Table S1, supplementary data).

### *Metabolic dependence of net water and ion fluxes*

Substitution of constant  $O_2$  bubbling with  $N_2$  bubbling had a significant effect on rectal  $J_v$  and  $J_{net}^{ion}$  at high temperature but no significant effect at low temperature (Fig. 3). Severe hypoxia drastically

reduced rectal  $J_v$  and  $J_{net}^{ion}$  by  $\sim 40\%$  ( $J_{net}^{K^+}$ ) -  $60\%$  ( $J_v$ ,  $J_{net}^{Na^+}$  and  $J_{net}^{Cl^-}$ ) at high temperature but did not significantly alter  $J_v$  and  $J_{net}^{ion}$  at low temperature.

#### *Temperature dependence of rectal paracellular permeability*

The clearance of the permeability probe FD4 was not significantly different at  $30^\circ\text{C}$  and after two hours at  $0^\circ\text{C}$  (Fig. 4A). The concentration of FD4 measured in the absorbate was  $\sim 3$ -fold higher at  $0^\circ\text{C}$  compared to that measured at  $30^\circ\text{C}$  (Fig. 4B). Nevertheless, the final volume in the absorbate was proportionally (i.e.,  $\sim 3.5$ -fold) lower due to slowed water reabsorption (Fig. 4C) so the FD4 content (volume x concentration) was not different in total absorbate collected at  $30^\circ\text{C}$  or  $0^\circ\text{C}$  ( $8.7 \pm 2.4$  ng vs.  $10.7 \pm 3.1$  ng per rectal sac, respectively).

#### *Dependence of net water and ion fluxes on osmolality and mucosal ion concentration, at high and low temperature*

The influence of mucosal ion concentration on  $J_v$  and  $J_{net}^{ion}$  is shown in Table 3. To test the influence of cation gradients on bulk water and ion movement, the standard mucosal saline (i.e., 'standard condition') used to bathe everted rectal sacs was replaced by serosal salines to cancel the cation gradients and test the effect of increased  $[\text{Na}^+]$  and reduced  $[\text{K}^+]$  on the mucosal side. Furthermore, we performed a different set of experiments with modified mucosal saline to test the effect of reduced mucosal  $[\text{Cl}^-]$  on  $J_v$  and  $J_{net}^{ion}$ .

$J_v$  was not affected by modification of ionic gradients and the corresponding change in mucosal  $\text{Na}^+$ ,  $\text{K}^+$  and  $\text{Cl}^-$  availability at  $30^\circ\text{C}$  (Fig.5A and Table 3). At  $0^\circ\text{C}$ ,  $J_v$  was halved when mucosal  $[\text{Cl}^-]$  was reduced (Fig.5A and Table 3) whereas change in mucosal [cation] had no effect. In addition,  $J_v$  was sensitive to change in mucosal osmolality. At  $30^\circ\text{C}$ , an osmotic gradient of  $300$   $\text{mOsm kg}^{-1}$  from the lumen significantly reduced  $J_v$  ( $3.7 \pm 0.8$   $\mu\text{l rectum}^{-1} \text{h}^{-1}$ ) compared to the 'standard condition' where no osmotic gradient was present ( $J_v = 14.76 \pm 0.3$   $\mu\text{l rectum}^{-1} \text{h}^{-1}$ ). Increasing the osmotic gradient to  $700$   $\text{mOsm kg}^{-1}$  ultimately prevented water reabsorption and reversed the direction of water movement:  $J_v$  was negative ( $-0.5 \pm 0.4$   $\mu\text{l rectum}^{-1} \text{h}^{-1}$ ), indicating *net* water secretion from the hemocoel side to the gut lumen (Fig.5B). At  $0^\circ\text{C}$ , the reduction in  $J_v$  induced by the tested osmotic gradients was proportional to the reduction observed in the absence of osmotic gradients (i.e.  $\sim 4$ -fold; Fig. 5B).

$J_{net}^{ion}$  was modified by a change in mucosal [ion]. Mucosal [Na<sup>+</sup>] and [K<sup>+</sup>] highly influenced  $J_{net}^{Na^+}$  and  $J_{net}^{K^+}$  across the rectal wall, independently of the temperature (Table 3). At both 30°C and 0°C, the change in  $J_{net}^{Na^+}$  and  $J_{net}^{K^+}$  was proportional to the change in mucosal [Na<sup>+</sup>] and [K<sup>+</sup>]. Specifically, a 2.5-fold change in mucosal [Na<sup>+</sup>] induced a ~ 2-fold change in net Na<sup>+</sup> flux while an 8-fold change in mucosal [K<sup>+</sup>] availability induced a similar ~ 8.5-fold change in net K<sup>+</sup> flux (Table 3). Interestingly, the overall  $J_{net}^{Cation}$  (sum of  $J_{net}^{Na^+}$  and  $J_{net}^{K^+}$ ) was unchanged.  $J_{net}^{Na^+}$  and  $J_{net}^{K^+}$  were only altered by changes in mucosal [Cl<sup>-</sup>] at 0°C. On the contrary,  $J_{net}^{Cl^-}$  was unaltered by mucosal [K<sup>+</sup>] and [Na<sup>+</sup>] at both 30°C and 0°C. Furthermore,  $J_{net}^{Cl^-}$  sensitivity to mucosal [Cl<sup>-</sup>] was temperature-dependent. Hence, a 2.5-fold reduction in mucosal [Cl<sup>-</sup>] did not significantly influence  $J_{net}^{Cl^-}$  at 30°C but drastically reduced it at 0°C (Table 3). The influence of osmotic gradient on  $J_{net}^{ion}$  could not be determined due to the reduced volume of absorbate collected, preventing the determination of ion concentration in the final absorbate.

## Discussion

Maintenance of ion and water balance is critical for cold tolerance of chill susceptible insects (Košťál et al., 2004; Overgaard and MacMillan, 2017). Here we provide direct evidence that osmoregulatory capacity of the hindgut is linked to cold tolerance in *L. migratoria*. Firstly, we show that the capacity of the hindgut to reabsorb water and major ions at low temperature is closely linked to the animal capacity to maintain organismal ion and water homeostasis under these conditions. Secondly, we show that warm- and cold- acclimated locusts, known to differ in their cold tolerance (Andersen et al., 2017b), differ in their hindgut osmoregulatory capacity in a corresponding manner. Finally, this study investigates the major physiological factors that determine hindgut osmoregulatory capacity during cold exposure. We show that active transport is reduced at low temperature while rectal permeability is unchanged during acute cold exposure. We further show that water reabsorption is severely depressed by severe hypoxia (likely due to suppressed active transport) and influenced by osmotic gradients and transepithelial Cl<sup>-</sup> gradient whereas it is independent from the strength of specific cation gradients across the epithelium (Na<sup>+</sup> and K<sup>+</sup> gradients).

*Effects of temperature on in vivo ion and water balance and ex vivo water and ion fluxes*

Consistent with earlier observations in *L. migratoria* and other orthopterans, we found that cation and water balance of the *L. migratoria* changes during chronic exposure to low temperature (Andersen et al., 2017b; Coello Alvarado et al., 2015; Des Marteaux and Sinclair, 2016; Findsen et al., 2013; MacMillan and Sinclair, 2011a). Hemolymph volume decreased along with  $[Na^+]_{ext}$  whereas  $[K^+]_{ext}$  more than doubles at temperatures below 5°C. Transport of  $Cl^-$  has been implicated as an important component of insect osmoregulation (Audsley et al., 2013; Peach and Phillips, 1991; Phillips et al., 1996) and here we observed a significant decrease in  $[Cl^-]_{ext}$  that was proportional to the decrease in  $[Na^+]_{ext}$  during chronic cold exposure. A previous study using *Gryllus* crickets showed that the reduction in hemolymph volume was associated with a proportional increase in gut water volume suggesting a strong interaction between the hemolymph and the gut (MacMillan and Sinclair, 2011a). The changes we observe in hemolymph ion and water balance occurs at considerably higher temperatures than those leading to chill coma in *L. migratoria* (around  $0 \pm 0.5^\circ C$  as reported by Findsen et al., 2014). Our observations are in agreement with recent studies which suggest that cold induced loss of movement in *L. migratoria* is caused primarily by neuronal dysfunction (Robertson et al., 2017) whereas loss of extracellular ion homeostasis is more associated with the chill injury that develops during chronic cold exposure (Overgaard and MacMillan, 2017).

An important site for ion and water reabsorption in the gut of orthopteran is the posterior region of the hindgut, i.e. the rectum. An early study in the Pyrenean grasshopper (*Oedipoda germanica*) suggested only a minor influence of temperature on rectal fluid reabsorption (Houlihan and Sell, 1984), but their study only tested reabsorption at benign temperatures (from 15°C to 35°C). Here, using *ex vivo* everted rectal sacs we investigated if hypothermia alters ion and water reabsorption across the rectum of locusts in a manner that is proportional to the homeostatic disruption of the hemolymph composition and volume. Overall, these values for  $J_v$  and  $J_{net}^{ion}$  were positive, indicating that the bulk of water and ion movement is dominated by *net* water and ion reabsorption from the gut lumen to the hemocoel side across the rectum of *L. migratoria*. In accordance with our hypothesis we found that ion and water reabsorption rates were gradually and significantly reduced with decreasing experimental temperatures. Thus, the reduction in  $J_v$ ,  $J_{net}^{Na^+}$  and  $J_{net}^{Cl^-}$  during low temperature exposure agree well with our *in vivo* measurements of  $[Na^+]_{ext}$ ,  $[Cl^-]_{ext}$  and hemolymph volume which were all reduced (Figures 1 and Table 2). Hence,

alteration in hemolymph volume and composition during cold exposure is, at least partly, linked to cold induced depression of rectal reabsorption capacity.

The drastic increase in *in vivo*  $[K^+]_{ext}$  cannot be directly explained by rectal transport capacity since  $K^+$  reabsorption ( $J_{net}^{K^+}$ ) decreases at low temperatures while  $[K^+]_{ext}$  increases. A recent study found regional difference in  $K^+$  transport rate along the gut of *L. migratoria* and observed the highest reabsorption rate of  $K^+$  at the ileum and lowest at the colon and rectum (Robertson et al., 2014). The increase in  $[K^+]_{ext}$  could therefore be tied to a combination of reduced hemolymph volume, passive diffusion/leak of  $K^+$  along its chemical gradients towards the hemolymph compartment and/or decreased active removal of  $K^+$  at other regions of the excretory system, for instance the Malpighian tubules. Recent studies comparing cold and warm acclimated/adapted *Drosophila* have for example shown that differences in epithelial leak,  $K^+$  excretion at the Malpighian tubule, and  $K^+$  reabsorption at the gut all contribute to intra- and inter-specific differences in homeostatic capacity during cold exposure in insects (Andersen et al., 2017b; MacMillan et al., 2015c; MacMillan et al., 2017; Yerushalmi et al., 2017).

#### *Effect of acclimation on net water and ion fluxes*

A number of previous studies in insects, including orthopterans, have shown that cold acclimation improves the ability to maintain ion balance and hence improve cold tolerance (Coello Alvarado et al., 2015; Košťál et al., 2004; Košťál et al., 2007; MacMillan et al., 2015b). This is also the case for *L. migratoria* where cold acclimation improves the ability to preserve and/or recover  $[Na^+]_{ext}$  and  $[K^+]_{ext}$  during and/or following cold exposure, respectively (Andersen et al., 2017b; Findsen et al., 2013). Considering the observed reduction in rectal reabsorption capacity at low temperature, we hypothesised that improved regulation of extracellular ion composition at low temperature is directly linked to increased osmoregulatory capacity of the rectum. Using a similar thermal treatment as in Andersen et al., 2017b, we show that the improved homeostatic capacity associated with cold acclimation is linked to a superior capacity for water and ion reabsorption at low temperature. Specifically, acclimation enhanced *net*  $Na^+$ ,  $Cl^-$  and water reabsorption ( $J_v$ ,  $J_{net}^{Na^+}$  and  $J_{net}^{Cl^-}$ ) at low temperature (10°C) in cold-acclimated locusts (Fig. 2). This could be caused by sustained activity of ion motive pumps in cold-acclimated animals or changes in passive resistance of the epithelia, but future electrophysiological and pharmacological studies are needed to examine this in detail. Interestingly, *net*  $K^+$  reabsorption was not increased in cold-acclimated locusts which could be interpreted as an adaptive response as  $K^+$  reabsorption would increase the



hyperkalemia associated with cold exposure (Fig. 2). However, both cold- and warm- acclimated locusts showed similar low levels of  $J_v$  and  $J_{net}^{ion}$  at 0°C (the temperature where large differences in *in vivo* homeostatic capacity have been found between acclimation groups). This suggests that homeostatic capacity is also tied to changes in the relative activity of specific ion transporters (i.e. Cl<sup>-</sup> and Na<sup>+</sup> reabsorption is increased and K<sup>+</sup> reabsorption is unchanged in cold acclimated animals). Further, the effects of cold-acclimation on  $J_v$ ,  $J_{net}^{Na^+}$  and  $J_{net}^{Cl^-}$  appeared transient since pre-incubation of recta from cold-acclimated locusts at 30°C prevented the enhancement of  $J_v$ ,  $J_{net}^{Na^+}$  and  $J_{net}^{Cl^-}$  observed with recta maintained and exposed to low temperature (Table S1). It is well established that insect osmoregulatory function is plastic and able to respond quickly to changing demands (Beyenbach, 2016; Terhzaz et al., 2015). Our finding that rapid re-warming of the recta removes the functional differences between acclimation groups suggest that this plasticity is linked to a temporary/reversible regulatory mechanism such as protein post-translational phosphorylation, but this suggestion needs to be tested in future studies.

#### *Metabolic dependence of net water and ion fluxes*

To characterize the active and passive component of rectal reabsorption we used severe hypoxia to inhibit active transport. Severe hypoxia decreased active transport considerably at high temperature but there was no additional inhibition of  $J_v$  and  $J_{net}^{ion}$  at low temperature (Fig. 1C and Fig. 3). This suggests that all active transport was already depleted by low temperature exposure. At high temperature, ~ 60% of ion and water transport was inhibited by severe hypoxia suggesting that more than half of rectal bulk water and ion movement is dependent on oxidative ATP-production which is consistent with earlier studies (Chamberlin and Phillips, 1982; Goh and Phillips, 1978; Williams et al., 1978). Nevertheless, ~ 40% of net water and ion fluxes remained despite hypothermia and severe hypoxia. Locusts can sustain long periods of severe hypoxia and our observation agrees with the general assumption that water and ion transport processes in locust rectum is partly passive (i.e. passive diffusion along osmotic and ionic gradients). It is also possible that anaerobic ATP production has fuelled part of the water and ion movement during severe hypoxia but further studies are needed to investigate this suggestion.

#### *Temperature dependence of rectal paracellular permeability*

Since net transport is influenced by both active transport and passive leak we assessed if rectal paracellular permeability changed with temperature. Recent studies have brought molecular and

cellular evidences that the passive leak of ions and water is influenced by alteration of the gut barrier function during cold exposure (Andersen et al., 2017b; Des Marteaux et al., 2017; MacMillan et al., 2017). To assess the paracellular permeability of the rectal wall in warm-acclimated locusts during short-term cold exposure we quantified the mucosal-to-serosal clearance of FD4. FD4 is a widely accepted marker of paracellular permeability (Bao et al., 2014; MacMillan et al., 2017; Wang et al., 2013; Yang et al., 2002; Zhang et al., 2009). In agreement with previous studies on *Drosophila*, we observed a significant increase in FD4-concentration during cold exposure suggesting an increase in permeability. However, the volume of absorbate was proportionally reduced during cold exposure due to the above described reduction in  $J_v$  at low temperature. Therefore, we did not observe significant increase in mucosal-to-serosal clearance of FD4 across the rectal wall suggesting that the permeability of the gut is not altered by short-term exposure (2 hours) at 0°C in warm-acclimated locusts (Fig. 4). Accordingly, it is possible that some of the change in FD4 concentration (i.e. increased leak) observed in recent studies are also linked to changes in hemolymph volume during cold exposure (Andersen et al., 2017b; MacMillan et al., 2017).

*Dependence of net water and ion fluxes on osmolality and mucosal ion concentration, at high and low temperature*

Bulk transport of water and ions is dependent on the ionic and osmotic gradients that drive/oppose active transport. However, to our knowledge the relative importance of specific ionic and osmotic gradients across the rectal wall at low temperature is largely unknown. To get first insight into the mechanisms of hindgut osmoregulation we investigated hindgut sensitivity to osmotic gradient and mucosal ion composition. Sustained fluid transport across the rectal wall is primarily associated with active transport of ions from the mucosal to serosal side of the epithelium (Beyenbach and Piermarini, 2008; Chapman, 2013; Goh and Phillips, 1978; Harrison et al., 2012). Accordingly, we manipulated mucosal concentration of major ions to determine their influence on  $J_v$  and  $J_{net}^{ion}$  at high and low temperature. For example, it has been suggested that water balance is influenced by epithelial  $\text{Na}^+$  gradients (Des Marteaux and Sinclair, 2016; MacMillan and Sinclair, 2011a; MacMillan et al., 2015b; Olsson et al., 2016). To test this hypothesis, we incubated everted rectal sacs with or without  $\text{Na}^+$  gradient from the gut to the lumen at high and low temperature. However, we did not observe any influence of  $\text{Na}^+$  gradient on  $J_v$  at either temperature (Fig. 5A and Table 3). Thus, water reabsorption appears to be mechanistically unrelated to the transepithelial  $\text{Na}^+$  gradient.

Importantly, this experiment only examines the role of cation gradients for rectal water transport and it is possible that the strength of particular ion gradients influences active or passive flux in other parts of the osmoregulatory system. The sensitivity of  $J_v$  to osmotic gradient across the rectal wall has previously been established in studies of the locust *S. gregaria* (i.e., an osmotic gradient of 650 mOsm kg<sup>-1</sup> prevented fluid reabsorption at 30°C; (Goh and Phillips, 1978). However, the effect of osmotic gradient at low temperature has not been investigated previously. As seen in Fig. 5B and Table 3,  $J_v$  was significantly reduced by osmotic gradient across the rectal wall. An osmotic gradient of 300 mOsm kg<sup>-1</sup> considerably reduced water reabsorption while an osmotic gradient of 700 mOsm kg<sup>-1</sup> completely prevented water reabsorption by active transport and lead to a net secretion of water (i.e. water movement into the gut lumen by osmosis).

Considering the impairment of water transport in the face of strong osmotic gradients across the rectal epithelia we speculate that evacuation of the gut content before cold exposure could prevent some of the water drift that has been associated with acute cold exposure. Indeed, many insects empty their guts in response to cold exposure (see reviews from Andreadis and Athanassiou, 2017; Ganji and Moharramipour, 2017; Rozsypal, 2015). This strategy is usually linked to depression of supercooling points but similar responses may also improve homeostatic regulation in chill sensitive insects that are also sensitive to the effects of low temperature irrespective of freezing.

Regarding the dependence of  $J_{net}^{ion}$  to specific ionic gradient,  $J_{net}^{Na^+}$  and  $J_{net}^{K^+}$  were highly dependent and proportional to the mucosal availability of Na<sup>+</sup> and K<sup>+</sup> respectively, as shown in Table 3. On the contrary,  $J_{net}^{Cl^-}$  was maintained when mucosal [Cl<sup>-</sup>] was reduced at high temperature. This suggests some flexibility of the active transport systems where total cation transport can be maintained at similar levels using either of the two major cations while anion transport may necessitate a constant flow of Cl<sup>-</sup> associated with active transport. Indeed, at low temperature the active component of ion and water transport was suppressed and both  $J_v$  and  $J_{net}^{Cl^-}$  were drastically reduced (Table 3 and Fig. 5A) agreeing with the assumption that water movement is tied to active transport of Cl<sup>-</sup> (Audsley et al., 2013; Hanrahan and Phillips, 1984). In addition,  $J_{net}^{Cl^-}$  was not influenced by change in mucosal [Na<sup>+</sup>] and [K<sup>+</sup>] tested, agreeing with previous evidences that Cl<sup>-</sup> transport is not coupled to Na<sup>+</sup> and K<sup>+</sup> movement (Phillips et al., 1988; Phillips et al., 1996).

## Conclusion

This study documents the regulation of bulk water and ion transport across the rectum of *L. migratoria* during cold exposure and provides insight into the metabolic, ionic and osmotic control of rectal reabsorption at high and low temperature. We demonstrated that temperature influences bulk water and ion movement across the rectum of an insect in a manner that can explain the well-known organismal loss of ion and water homeostasis during cold exposure. Further, we showed that cold-acclimation improved net water,  $\text{Cl}^-$  and  $\text{Na}^+$  reabsorption at low temperature which partly explained the previously reported maintenance of homeostasis and increased cold tolerance in cold acclimated *L. migratoria* (Andersen et al., 2017b). Additionally, we demonstrated that osmotic and  $\text{Cl}^-$  gradients have marked influence on reabsorptive capacity while water reabsorption seems independent of the strength of  $\text{Na}^+$  or  $\text{K}^+$  gradients. The present study therefore confirms the link between osmoregulatory capacity and thermal tolerance in insects (Overgaard and MacMillan, 2017). Considering this association, future electrophysiological and pharmacological studies are necessary to investigate how aspects of cold adaptation and acclimation are tied to osmoregulatory function in insect. These studies could include investigations of specific ion transporters (e.g.  $\text{Na}^+/\text{K}^+$ -ATPase, V-Type- $\text{H}^+$ -ATPase and  $\text{Cl}^-$  electrogenic pump), iono-regulatory peptides (e.g. Chloride Transport Stimulating Hormone (CTSH) and Insect Transport Neuropeptide (ITP) at the hindgut), signalling pathways (e.g. cAMP and cGMP), membrane barrier function and permeability and how these factors are influenced by cold exposure, cold acclimation and cold adaptation.

## List of abbreviations

$J_v$ : Net fluid flux

$J_{net}^{ion}$ : Net flux of any specific ion measured

$J_{net}^{Na^+}$ : Net flux of sodium

$J_{net}^{K^+}$ : Net flux of potassium

$J_{net}^{Cl^-}$ : Net flux of chloride

FD4: fluorescein isothiocyanate dextran with a molecular mass of 4,000 Da

## Acknowledgements

We thank Kirsten Kromand for technical assistance and Mads Kuhlmann Andersen for constructive comments to the MS.

**Competing interest**

The authors declare no competing or financial interest.

**Author contributions**

L.G. and J.O. conceived the study and designed the experiments; L.G. performed the experiments, analysed the data and drafted the manuscript; J.O. edited the manuscript.

**Funding**

This research was supported by a grant from Det Frie Forskningsråd | Natur og Univers (to J.O.)

## References

- Andersen, M. K., MacMillan, H. A., Donini, A. and Overgaard, J.** (2017a). Cold tolerance of *Drosophila* species is tightly linked to epithelial K<sup>+</sup> transport capacity of the Malpighian tubules and rectal pads. *J. Exp. Biol.* **220**, 4261–4269.
- Andersen, M. K., Folkersen, R., MacMillan, H. A. and Overgaard, J.** (2017b). Cold acclimation improves chill tolerance in the migratory locust through preservation of ion balance and membrane potential. *J. Exp. Biol.* **220**, 487–496.
- Andreadis, S. and Athanassiou, C. G.** (2017). A review of insect cold hardiness and its potential in stored product insect control. *Crop Prot.* **91**, 93–99.
- Audsley, N., Jensen, D. and Schooley, D. A.** (2013). Signal transduction for *Schistocerca gregaria* ion transport peptide is mediated via both cyclic AMP and cyclic GMP. *Peptides* **41**, 74–80.
- Bale, J. S.** (1996). Insect cold hardiness: A matter of life and death. *Eur. J. Entomol.* **93**, 369–382.
- Bao, J., Tan, S., Yu, W., Lin, Z., Dong, Y., Chen, Q., Shi, J., Duan, K., Bai, X., Xu, L., et al.** (2014). The effect of peritoneal air exposure on intestinal mucosal barrier. *Gastroenterol. Res. Pract.* **2014**, Article ID: 674875.
- Beyenbach, K. W.** (2016). The plasticity of extracellular fluid homeostasis in insects. *J. Exp. Biol.* **219**, 2596–2607.
- Beyenbach, K. W. and Piermarini, P. M.** (2008). Osmotic and ionic regulation in insects. In *Osmotic and Ionic Regulation: Cells and Animals* (ed. Evans, D.), pp. 231–294. CRC Press.
- Chamberlin, M. E. and Phillips, J. E.** (1982). Metabolic support of chloride-dependent short-circuit current across Locust rectum. *J. Exp. Biol.* **99**, 349–361.
- Chapman, R.** (2013). *The Insects Structure and Function*. Cambridge University Press.
- Chown, S. L. and Nicolson, S.** (2004). *Insect Physiological Ecology*. Oxford Univ. Press.
- Chown, S. L. and Terblanche, J. S.** (2006). Physiological Diversity in Insects: Ecological and Evolutionary Contexts. In *Advances in Insect Physiology*, pp. 50–152.
- Coello Alvarado, L. E., MacMillan, H. A. and Sinclair, B. J.** (2015). Chill-tolerant *Gryllus* crickets maintain ion balance at low temperatures. *J. Insect Physiol.* **77**, 15–25.
- Des Marteaux, L. E. and Sinclair, B. J.** (2016). Ion and water balance in *Gryllus* crickets during the first twelve hours of cold exposure. *J. Insect Physiol.* **89**, 19–27.
- Des Marteaux, L. E., McKinnon, A. H., Udaka, H., Toxopeus, J. and Sinclair, B. J.** (2017). Effects of cold-acclimation on gene expression in Fall field cricket (*Gryllus pennsylvanicus*)

ionoregulatory tissues. *BMC Genomics* **18**, 357.

- Des Marteaux, L. E., Khazraenia, S., Yerushalmi, G. Y., Donini, A., Li, N. G. and Sinclair, B. J.** (2018). The effect of cold acclimation on active ion transport in cricket ionoregulatory tissues. *Comp. Biochem. Physiol. Part A Mol. Integr. Physiol.* **216**, 28–33.
- Edney, E.** (1977). *Water Balance in Land Arthropods*. Berlin: Springer-Verlag.
- Findsen, A., Andersen, J. L., Calderon, S. and Overgaard, J.** (2013). Rapid cold hardening improves recovery of ion homeostasis and chill coma recovery time in the migratory locust, *Locusta migratoria*. *J. Exp. Biol.* **216**, 1630–1637.
- Findsen, A., Pedersen, T. H., Petersen, A. G., Nielsen, O. B. and Overgaard, J.** (2014). Why do insects enter and recover from chill coma? Low temperature and high extracellular potassium compromise muscle function in *Locusta migratoria*. *J. Exp. Biol.* **217**, 1297–1306.
- Ganji, Z. and Moharramipour, S.** (2017). Cold hardiness strategy in field collected larvae of *Scrobipalpa ocellatella* (Lepidoptera: Gelechiidae). *J. Entomol. Soc. Iran* **36**, 287–296.
- Goh, S. and Phillips, J.** (1978). Dependence of prolonged water absorption by *in vitro* locust rectum on ion transport. *J. Exp. Biol.* **72**, 25–41.
- Hanrahan, J. W. and Phillips, J. E.** (1984). KCl transport across an insect epithelium : tracer fluxes and the effects of ion substitutions. *J. Membr. Biol.* **80**, 15–26.
- Hanrahan, J. W., Meredith, J., Phillips, J. E. and Brandys, D.** (1984). Methods for the study of transport and control in insect hindgut. In *Measurement of ion transport and metabolic rate in insects* (ed. Miller, T. A.), pp. 19–68. Springer-Verlag.
- Harrison, J. F., Woods, H. A. and Roberts, S. P.** (2012). *Ecological and Environmental Physiology of Insects*. New York: Oxford Univ. Press.
- Houlihan, D. F. and Sell, D.** (1984). The effects of temperature on the energetics of rectal fluid transport. *J. Insect Physiol.* **30**, 137–143.
- Irvine, B., Audsley, N., Lechleitner, R., Meredith, J., Thomson, B. and Phillips, J. E.** (1988). Transport properties of locust ileum *in vitro*: effects of cyclic AMP. *J. Exp. Biol.* **137**, 361–385.
- Košťál, V., Vambera, J. and Bastl, J.** (2004). On the nature of pre-freeze mortality in insects: water balance, ion homeostasis and energy charge in the adults of *Pyrrhocoris apterus*. *J. Exp. Biol.* **207**, 1509–1521.
- Košťál, V., Renault, D., Mehrabianová, A. and Bastl, J.** (2007). Insect cold tolerance and repair of chill-injury at fluctuating thermal regimes: Role of 70 kda heat shock protein expression.

*Comp. Biochem. Physiol. -Part A* **147**, 231–238.

- MacMillan, H. A. and Sinclair, B. J.** (2011a). The role of the gut in insect chilling injury: cold-induced disruption of osmoregulation in the fall field cricket, *Gryllus pennsylvanicus*. *J. Exp. Biol.* **214**, 726–734.
- MacMillan, H. A. and Sinclair, B. J.** (2011b). Mechanisms underlying insect chill-coma. *J. Insect Physiol.* **57**, 12–20.
- MacMillan, H. A., Findsen, A., Pedersen, T. H. and Overgaard, J.** (2014). Cold-induced depolarization of insect muscle: differing roles of extracellular K<sup>+</sup> during acute and chronic chilling. *J. Exp. Biol.* **217**, 2930–2938.
- MacMillan, H. A., Andersen, J. L., Davies, S. A. and Overgaard, J.** (2015a). The capacity to maintain ion and water homeostasis underlies interspecific variation in *Drosophila* cold tolerance. *Sci. Rep.* **5**, 18607.
- MacMillan, H. A., Andersen, J. L., Loeschcke, V. and Overgaard, J.** (2015b). Sodium distribution predicts the chill tolerance of *Drosophila melanogaster* raised in different thermal conditions. *Am. J. Physiol. - Regul. Integr. Comp. Physiol.* **308**, R823–R831.
- MacMillan, H. A., Baatrup, E. and Overgaard, J.** (2015c). Concurrent effects of cold and hyperkalaemia cause insect chilling injury. *Proc. R. Soc. B* **282**, 20151483.
- MacMillan, H. A., Ferguson, L. V., Nicolai, A., Donini, A., Staples, J. F. and Sinclair, B. J.** (2015d). Parallel ionoregulatory adjustments underlie phenotypic plasticity and evolution of *Drosophila* cold tolerance. *J. Exp. Biol.* **218**, 423–432.
- MacMillan, H. A., Ye, G. Y., Jonusaite, S., Kelly, S. P. and Donini, A.** (2017). Thermal acclimation mitigates cold-induced paracellular leak from the *Drosophila* gut. *Sci. Rep.* **7**, 8807.
- Nedved, O.** (2000). Snow white and the seven dwarfs: a multivariate approach to classification of cold tolerance. *Cryo Letters* **21**, 339–348.
- O’Sullivan, J. D. B., Macmillan, H. A. and Overgaard, J.** (2016). Heat stress is associated with disruption of ion balance in the migratory locust, *Locusta migratoria*. *J. Therm. Biol.* 1–9.
- Olsson, T., MacMillan, H. A., Nyberg, N., Stærk, D., Malmendal, A. and Overgaard, J.** (2016). Hemolymph metabolites and osmolality are tightly linked to cold tolerance of *Drosophila* species: a comparative study. *J. Exp. Biol.* **219**, 2504–2513.
- Overgaard, J. and MacMillan, H. A.** (2017). The integrative physiology of insect chill tolerance. *Annu. Rev. Physiol.* **79**, 8.1-8.22.



- Peach, J. L. and Phillips, J. E.** (1991). Metabolic support of chloride-dependent short-circuit current across the locust (*Schistocerca gregaria*) ileum. *J. Insect Physiol.* **37**, 255–260.
- Phillips, J.** (1981). Comparative physiology of insect renal-function. *Am. J. Physiol. - Regul. Integr. Comp. Physiol.* **241**, R241-257.
- Phillips, J. E. and Audsley, N.** (1995). Neuropeptide control of ion and fluid transport across Locust hindgut. *Am. Zool.* **35**, 503–514.
- Phillips, J. and Dockrill, A.** (1968). Molecular sieving of hydrophilic molecules by the rectal intima of the desert locust (*Schistocerca gregaria*). *J. Exp. Biol.* **48**, 521–532.
- Phillips, J. E., Audsley, N., Lechleitner, R., Thomson, B., Meredith, J. and Chamberlin, M.** (1988). Some major transport mechanisms of insect absorptive epithelia. *Comp. Biochem. Physiol.* **90A**, 643–650.
- Phillips, J. E., Wiens, C., Audsley, N., Jeffs, L., Bilgen, T. and Meredith, J.** (1996). Nature and control of chloride transport in insect absorptive epithelia. *J. Exp. Zool.* **275**, 292–299.
- Phillips, J. E., Meredith, J., Audsley, N., Richardson, N., Macins, A. and Ring, M.** (1998). Locust Ion Transport Peptide (ITP): a putative hormone controlling water and ionic balance in terrestrial insects. *Am. Zool.* **38**, 461–470.
- Robertson, L., Donini, A. and Lange, A. B.** (2014). K<sup>+</sup> absorption by locust gut and inhibition of ileal K<sup>+</sup> and water transport by FGLamide allatostatins. *J. Exp. Biol.* **217**, 3377–3385.
- Robertson, R. M., Spong, K. E. and Srithiphaphirom, P.** (2017). Chill coma in the locust, *Locusta migratoria*, is initiated by spreading depolarization in the central nervous system. *Sci. Reports* **7**, 10297.
- Rozsypal, J.** (2015). The role of water, ice nucleators, and inoculation in insect cold survival. *Open access insect physiol.* **5**, 21–30.
- Sinclair, B. J., Coello Alvarado, L. E. and Ferguson, L. V.** (2015). An invitation to measure insect cold tolerance: Methods, approaches, and workflow. *J. Therm. Biol.* **53**, 180–197.
- Terhzaz, S., Teets, N. M., Cabrero, P., Henderson, L., Ritchie, M. G., Nachman, R. J., Dow, J. A. T., Denlinger, D. L. and Davies, S.-A.** (2015). Insect capa neuropeptides impact desiccation and cold tolerance. *Proc. Natl. Acad. Sci.* **112**, 2882–2887.
- Wang, Y., Gosselin Grenet, A. S., Castelli, I., Cermenati, G., Ravallec, M., Fiandra, L., Debaisieux, S., Multeau, C., Lautredou, N., Dupressoir, T., et al.** (2013). Densovirus crosses the insect midgut by transcytosis and disturbs the epithelial barrier function. *J. Virol.* **87**, 12380–12391.

- Whittamore, J. M., Genz, J., Grosell, M. and Wilson, R. W.** (2016). Measuring intestinal fluid transport in vitro: Gravimetric method versus non-absorbable marker. *Comp. Biochem. Physiol. -Part A Mol. Integr. Physiol.* **194**, 27–36.
- Williams, D., Phillips, J. E., Prince, W. T. and Meredith, J.** (1978). The source of short-circuit current across locust rectum. *J. Exp. Biol.* **77**, 107–122.
- Yang, R., Gallo, D. J., Baust, J. J., Watkins, S. K., Delude, R. L. and Fink, M. P.** (2002). Effect of hemorrhagic shock on gut barrier function and expression of stress-related genes in normal and gnotobiotic mice. *Am. J. Physiol. - Regul. Integr. Comp. Physiol.* **283**, R1263–R1274.
- Yerushalmi, G. Y., Misyura, L., MacMillan, H. A. and Donini, A.** (2017). Plasticity of the gut and the Malpighian tubules underlies cold acclimation and mitigates cold-induced hyperkalemia in *Drosophila melanogaster*. Submitted to *J. Exp. Biol.*
- Zhang, H. Y., Radulescu, A. and Besner, G. E.** (2009). Heparin-binding EGF-like growth factor is essential for preservation of gut barrier function after hemorrhagic shock and resuscitation in mice. *Surgery* **146**, 334–339.

## Figures

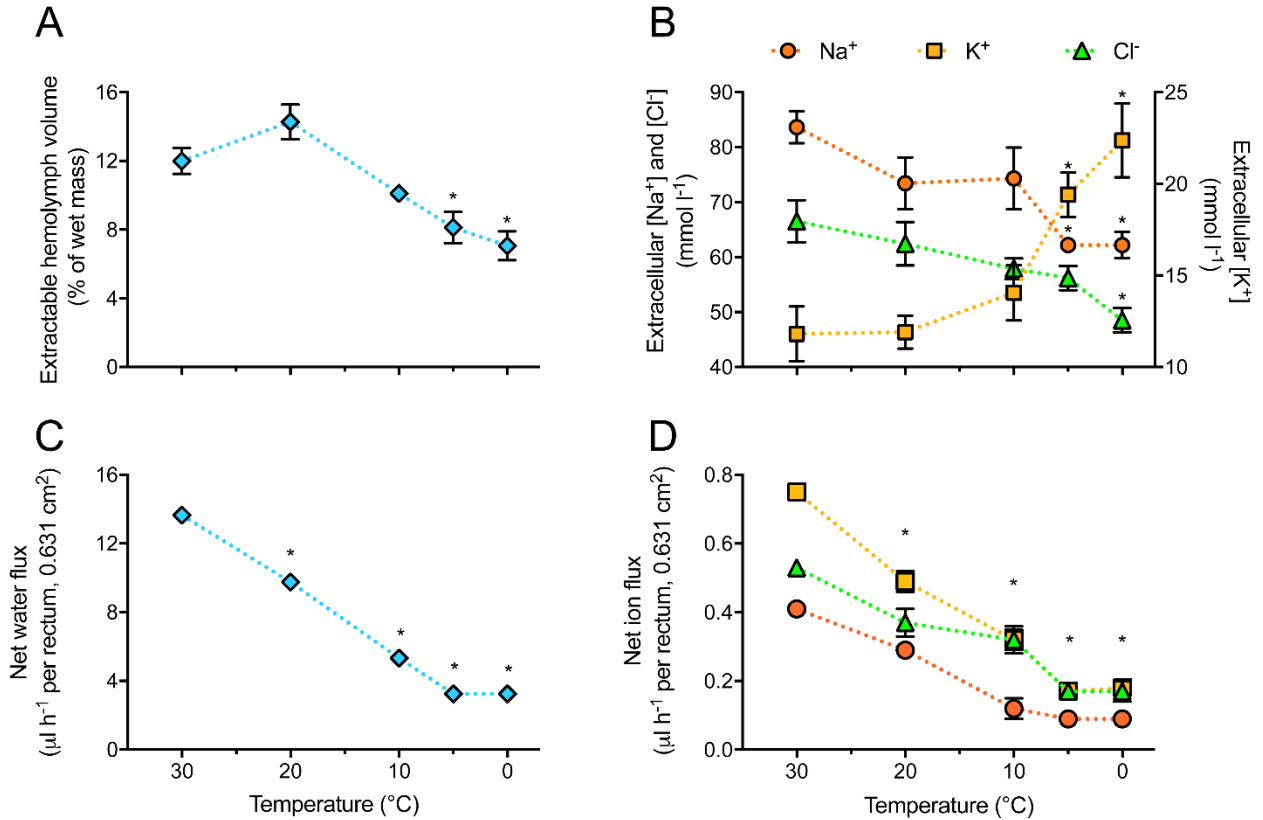

**Figure 1. Effect of temperature on organismal homeostasis and rectal osmoregulatory capacity in *L. migratoria*.** Extractable volume (A) and ionic (Na<sup>+</sup>, K<sup>+</sup>, Cl<sup>-</sup>) composition (B) of hemolymph in warm-acclimated locusts exposed for two days to 30°C, 20°C, 10°C, 5°C and 0°C (N= 7 per group). Net water (C) and ion (Na<sup>+</sup>, K<sup>+</sup>, Cl<sup>-</sup>; D) fluxes across the rectal wall of warm-acclimated locusts at 30°C, 20°C, 10°C, 5°C and 0°C (N= 6 per group). Data were analysed with one-way ANOVA followed by Tukey's multiple comparison test (p-value < 0.05), values significantly different from control values (i.e., at 30°C) are indicated by an asterisk (see Table 2 for more details). Positive values for  $J_v$  and  $J_{net}^{ion}$  indicate *net* reabsorption from the rectal lumen towards the hemolymph. For some points, the error bars are shorter than the height of the symbol and are therefore not visible.

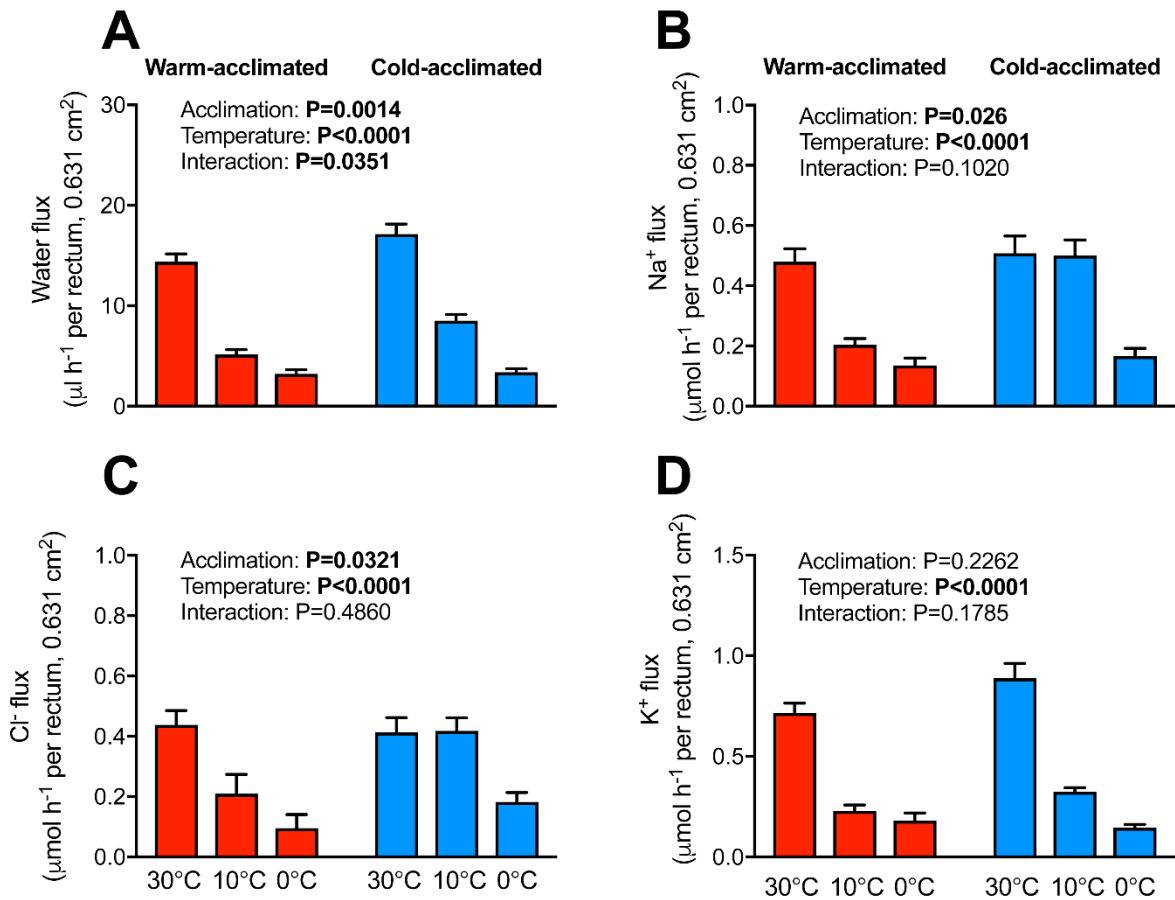

**Figure 2. Effect of thermal acclimation on rectal osmoregulatory capacity.** Net water (A) and ion (B, C, D) fluxes across the rectum wall at 30°C, 10°C and 0°C in locusts acclimated for five days at either  $30 \pm 1^\circ\text{C}$  (warm-acclimated; red) or  $11 \pm 1^\circ\text{C}$  (cold-acclimated; blue).  $N=7$  per group, data were analysed with repeated measure two-way ANOVA ( $p$ -value  $< 0.05$ ). Positive values for  $J_v$  and  $J_{net}^{ion}$  indicate *net* reabsorption from the rectal lumen towards the hemolymph.

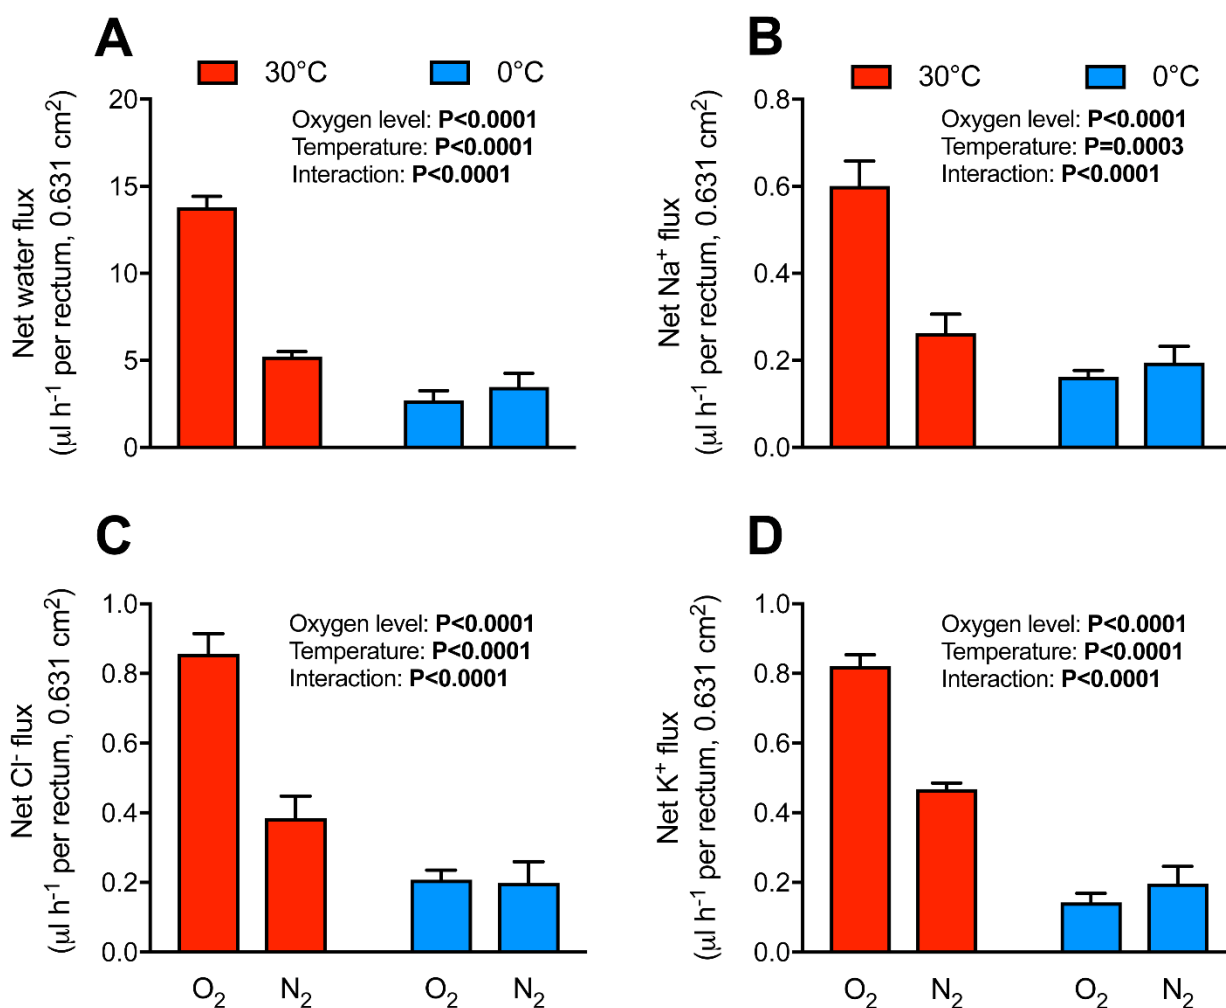

**Figure 3. Effect of hypoxia and hypothermia on rectal osmoregulatory capacity.** Net water (A) and ions (B, C, D) fluxes across the rectum wall at 30°C and 0°C with either constant O<sub>2</sub> (normoxia) or N<sub>2</sub> (severe hypoxia) bubbling in warm-acclimated locusts. N= 5 per group, data were analysed with repeated measure two-way ANOVA ( $p$ -value  $< 0.05$ ). Positive values for  $J_v$  and  $J_{net}^{ion}$  indicate *net* reabsorption from the rectal lumen towards the hemolymph.

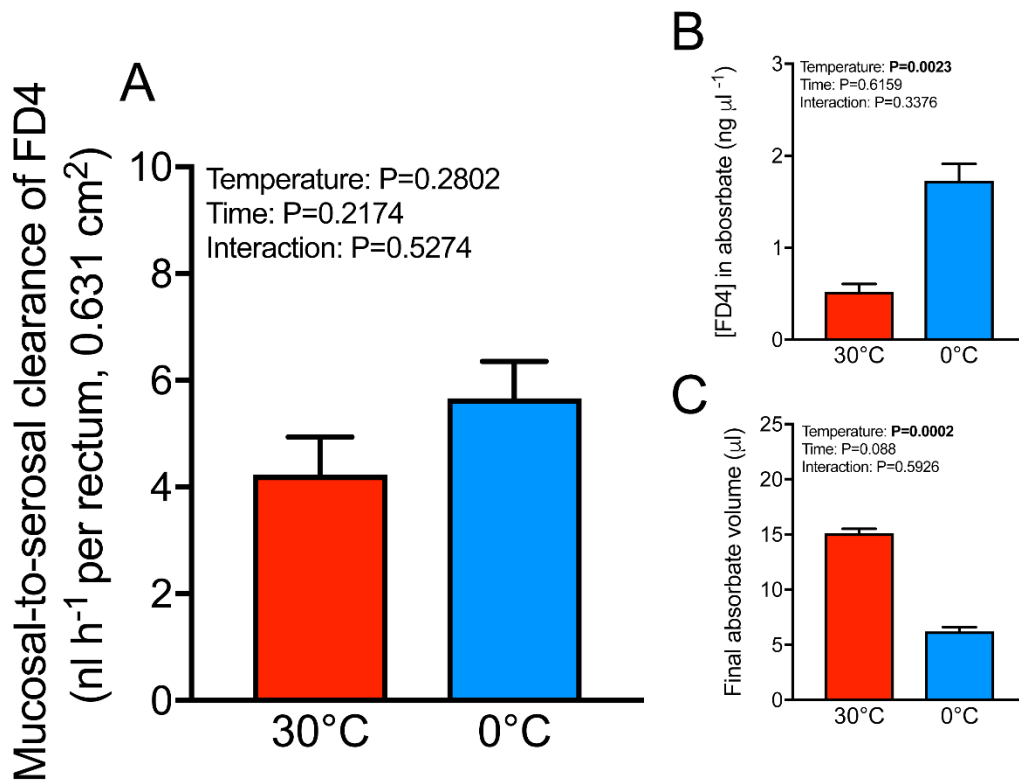

**Figure 4. Temperature dependence of rectal paracellular permeability.** Mucosal-to-serosal clearance of FD4 (A) across the rectal wall of warm-acclimated locusts was determined from the concentration of FD4 (B) and fluid volume (C) of the final absorbate at 30°C and 0°C. N= 5, data were analysed with repeated measured two-way ANOVA (p-value < 0.05). Positive values for  $J_v$  and  $J_{net}^{ion}$  indicate *net* reabsorption from the rectal lumen towards the hemolymph.

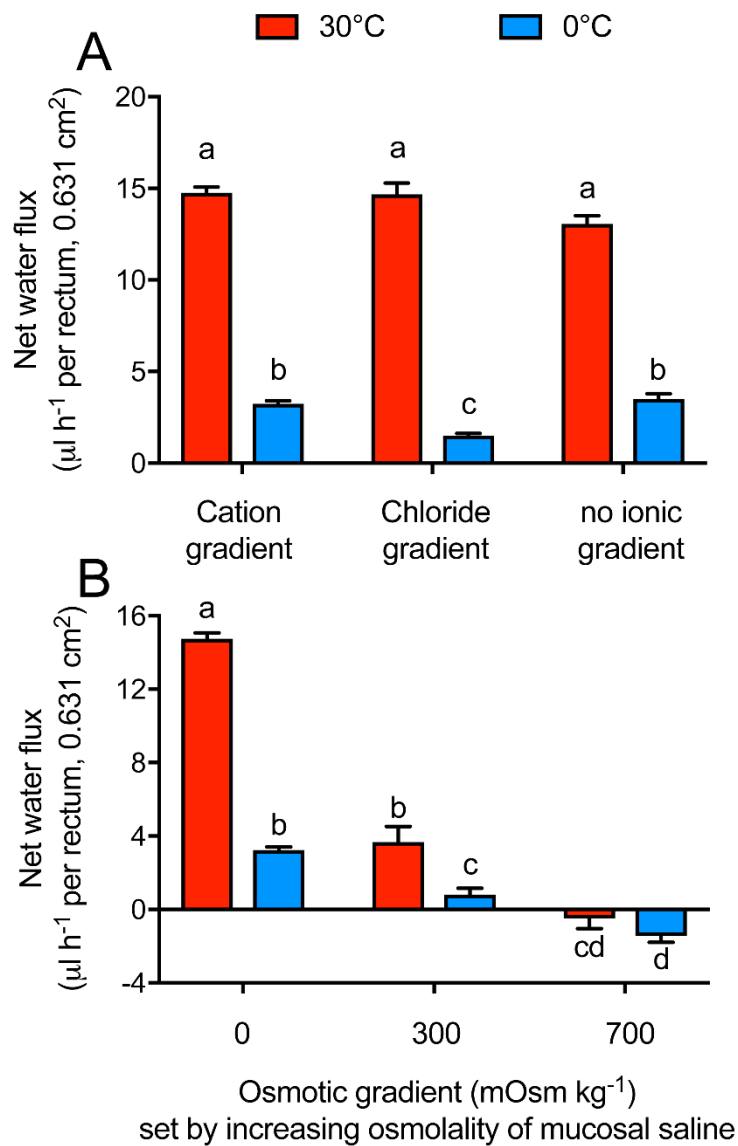

**Figure 5. Dependence of net water flux on osmotic and ionic gradients, at high and low temperature.** Net water flux across the rectal wall of warm-acclimated locusts without ionic gradient or with cation ( $\text{Na}^+/\text{K}^+$ ) or  $\text{Cl}^-$  gradients (A) or with osmotic gradients of 300 or 700 mOsmol  $\text{kg}^{-1}$  (i.e., hyperosmotic mucosal – standard serosal salines; B) at 30°C and 0°C. N= 5-7 per group, data were analysed with one-way ANOVA followed by Tukey's multiple comparison test ( $p$ -value < 0.05). Positive values for  $J_v$  indicate net fluid absorption from the rectal lumen towards the hemolymph while negative values indicate net fluid secretion from the hemocoel towards the rectal lumen.

## Tables

**Table 1.** Ion composition of salines used in the present study (concentrations are given in mmol l<sup>-1</sup> and the final osmolality is given in mOsm kg<sup>-1</sup>). The standard mucosal and serosal salines were formulated to resemble Malpighian tubules fluid and hemocoel fluid, respectively, and are defined as ‘standard condition’ and represent the reference group for all comparisons. Composition of salines is based on the Ringer of Mordue (1969) with modifications from Hanrahan et al., 1984, widely used to bathe everted rectum sac of locusts in early studies. The mucosal saline used to bathe the everted rectal sacs was replaced by “serosal saline on mucosal side” or modified mucosal saline for experiments manipulating osmotic and ionic gradients across the rectal wall. The pH of all salines was adjusted to 7,0 with the addition of NaOH. Differences in ion concentration and osmolality between saline solutions are highlighted in bold.

|                               | ‘Standard condition’ |              | Modified mucosal side                        |                      |              |               |
|-------------------------------|----------------------|--------------|----------------------------------------------|----------------------|--------------|---------------|
|                               | Serosal side         | Mucosal side | ↑ [Na <sup>+</sup> ] and ↓ [K <sup>+</sup> ] | ↓ [Cl <sup>-</sup> ] | ↑ Osmolality | ↑↑ Osmolality |
| Na <sup>+</sup>               | <b>120</b>           | <b>45</b>    | <b>120</b>                                   | 45                   | 45           | 45            |
| Cl <sup>-</sup>               | <b>110</b>           | 110          | <b>110</b>                                   | <b>50</b>            | 110          | 110           |
| K <sup>+</sup>                | <b>6</b>             | <b>90</b>    | <b>6</b>                                     | 90                   | 90           | 90            |
| PO <sub>4</sub> <sup>-3</sup> | 6                    | 6            | 6                                            | 6                    | 6            | 6             |
| HCO <sub>3</sub> <sup>-</sup> | 2                    | 2            | 2                                            | 3                    | 2            | 2             |
| Ca <sup>2+</sup>              | 2                    | 2            | 2                                            | 3                    | 2            | 2             |
| Mg <sup>2+</sup>              | 4                    | 4            | 4                                            | 4                    | 4            | 4             |
| SO <sub>4</sub> <sup>-2</sup> | -                    | -            | 15                                           | -                    | -            | -             |
| Proline                       | 15                   | 38           | 15                                           | 38                   | 38           | 38            |
| Glycine                       | 14                   | 4            | 14                                           | 4                    | 4            | 4             |
| Trehalose                     | 16                   | -            | 16                                           | -                    | -            | -             |
| Glucose                       | 17                   | 17           | 17                                           | 17                   | 17           | 17            |
| Osmolality <sup>1</sup>       | 330                  | 330          | 330                                          | 330                  | <b>630</b>   | <b>1030</b>   |

<sup>1</sup> Sucrose was added to adjust the osmolality of the different solutions.



**Table 2.** Net water and ion fluxes measured across the rectum wall of *L. migratoria* at 30°C, 20°C, 10°C, 5°C and 0°C.

| Temperature (°C) | Water               |              | Na <sup>+</sup>      |              | K <sup>+</sup>       |              | Cl <sup>-</sup>      |              |
|------------------|---------------------|--------------|----------------------|--------------|----------------------|--------------|----------------------|--------------|
|                  | Net flux            | % of control | Net flux             | % of control | Net flux             | % of control | Net flux             | % of control |
| 30               | 14,1 ± 0,2 <b>a</b> | -            | 0,41 ± 0,01 <b>a</b> | -            | 0,75 ± 0,02 <b>a</b> | -            | 0,53 ± 0,02 <b>a</b> | -            |
| 20               | 9,8 ± 0,3 <b>b</b>  | 72%          | 0,29 ± 0,02 <b>b</b> | 71%          | 0,49 ± 0,03 <b>b</b> | 65%          | 0,37 ± 0,04 <b>b</b> | 70%          |
| 10               | 5,3 ± 0,1 <b>c</b>  | 39%          | 0,12 ± 0,03 <b>c</b> | 29%          | 0,32 ± 0,03 <b>c</b> | 43%          | 0,32 ± 0,04 <b>c</b> | 61%          |
| 5                | 3,3 ± 0,1 <b>d</b>  | 24%          | 0,09 ± 0,02 <b>c</b> | 22%          | 0,17 ± 0,02 <b>d</b> | 23%          | 0,17 ± 0,02 <b>d</b> | 32%          |
| 0                | 3,2 ± 0,2 <b>d</b>  | 24%          | 0,09 ± 0,02 <b>c</b> | 22%          | 0,18 ± 0,02 <b>d</b> | 24%          | 0,17 ± 0,03 <b>d</b> | 32%          |

Net water transport ( $J_v$ ) is expressed as  $\mu\text{l rectum}^{-1} \text{h}^{-1}$  and net ion fluxes ( $J_{net}^{ion}$ ) as  $\mu\text{mol rectum}^{-1} \text{h}^{-1}$  and accompanied by the relative reductions compared to controls (given as % of control). Positive values for  $J_v$  and  $J_{net}^{ion}$  indicate *net* reabsorption from the rectal lumen towards the hemolymph. N=6 per group and means flanked by different **letters** were significantly different (p-value <0.05) based on one-way ANOVA followed by Tukey's multiple comparison test.

**Table 3.** Influence of mucosal [ion] on net ion flux across the rectal wall of *L. migratoria*, at high (30 °C) and low (0 °C) temperature.

| Mucosal [ion]                              | Net water flux        |              | Net Na <sup>+</sup> flux |              | Net K <sup>+</sup> flux |              | Net Cl <sup>-</sup> flux |              |
|--------------------------------------------|-----------------------|--------------|--------------------------|--------------|-------------------------|--------------|--------------------------|--------------|
|                                            | 30°C                  | 0°C          | 30°C                     | 0°C          | 30°C                    | 0°C          | 30°C                     | 0°C          |
| standard condition                         | 14,76 ± 0,32 <b>a</b> | 3,24 ± 0,16  | 0,47 ± 0,02 <b>a</b>     | 0,09 ± 0,02  | 0,78 ± 0,07 <b>a</b>    | 0,21 ± 0,02  | 0,61 ± 0,04 <b>a</b>     | 0,17 ± 0,03  |
| [Cl <sup>-</sup> ] ↓                       | 14,68 ± 0,61 <b>a</b> | 1,50 ± 0,12* | 0,50 ± 0,03 <b>a</b>     | 0,02 ± 0,02* | 0,58 ± 0,03 <b>a</b>    | 0,06 ± 0,01* | 0,50 ± 0,06 <b>a</b>     | 0,01 ± 0,03* |
| [Na <sup>+</sup> ] ↑ - [K <sup>+</sup> ] ↓ | 13,06 ± 0,45 <b>a</b> | 3,50 ± 0,29  | 1,12 ± 0,05 <b>b</b>     | 0,33 ± 0,06  | 0,09 ± 0,01 <b>b</b>    | 0,02 ± 0,004 | 0,65 ± 0,09 <b>a</b>     | 0,18 ± 0,04  |

Net water flux ( $J_v$ ) is expressed as  $\mu\text{l rectum}^{-1} \text{h}^{-1}$  and net ion fluxes ( $J_{net}^{ion}$ ) as  $\mu\text{mol rectum}^{-1} \text{h}^{-1}$ . Positive values for  $J_v$  and  $J_{net}^{ion}$  indicate *net* reabsorption from the rectal lumen towards the hemolymph. N=5 - 7 per group and means flanked by different **letters** were significantly different to the ‘standard condition’ at 30°C (first row). The percent of change in  $J_v$  and  $J_{net}^{ion}$  between 30°C and 0°C under the same experimental condition were calculated and compared to the percent change observed under ‘standard condition’ and flanked by a star (\*) when significantly different. P-value <0.05, based on one-way ANOVA followed by Tukey's multiple comparison test.
